# Supplementary material for: Enhanced Antimicrobial Action of Chlorhexidine Loaded in Shellac Nanoparticles with Cationic Surface Functionality
Source: Pharmaceutics. 2021 Sep 2;13(9):1389. doi: 10.3390/pharmaceutics13091389 (PMC8470920; doi:10.3390/pharmaceutics13091389)
Supplement: Supplementary file 1 [file pharmaceutics-13-01389-s001.zip › pharmaceutics-1343599-SI.pdf]

# Supplementary Material: Enhanced Antimicrobial Action of Chlorhexidine Loaded in Shellac Nanoparticles with Cationic Surface Functionality

Saba S. M. Al-Obaidy, Gillian M. Greenway, and Vesselin N. Paunov

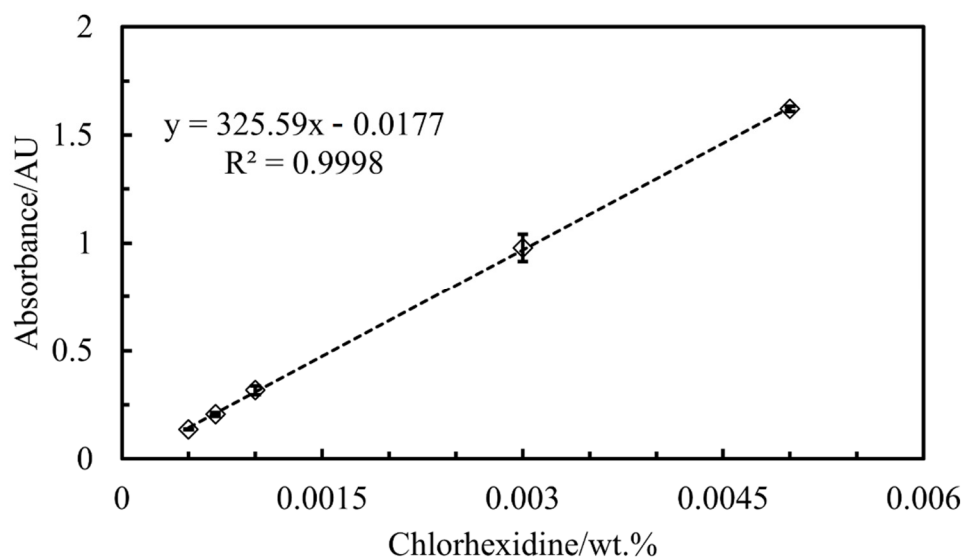

**Citation:** Al-Obaidy, S.S.M.; Greenway, G.M.; Paunov, V.N. Enhanced Antimicrobial Action of Chlorhexidine Loaded in Shellac Nanoparticles with Cationic Surface Functionality. *Pharmaceutics* **2021**, *13*, 1389. <https://doi.org/10.3390/pharmaceutics13091389>

**Figure S1.** The UV-vis calibration curve at 255 nm of different concentrations of chlorhexidine digluconate (CHX-DG) in deionized water, ( $n = 3$ ).

Academic Editor: Ivana Cacciatore

Received: 2 August 2021

Accepted: 29 August 2021

Published: 2 September 2021

**Publisher's Note:** MDPI stays neutral with regard to jurisdictional claims in published maps and institutional affiliations.

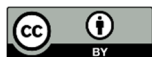

**Copyright:** © 2021 by the authors. Licensee MDPI, Basel, Switzerland. This article is an open access article distributed under the terms and conditions of the Creative Commons Attribution (CC BY) license (<http://creativecommons.org/licenses/by/4.0/>).

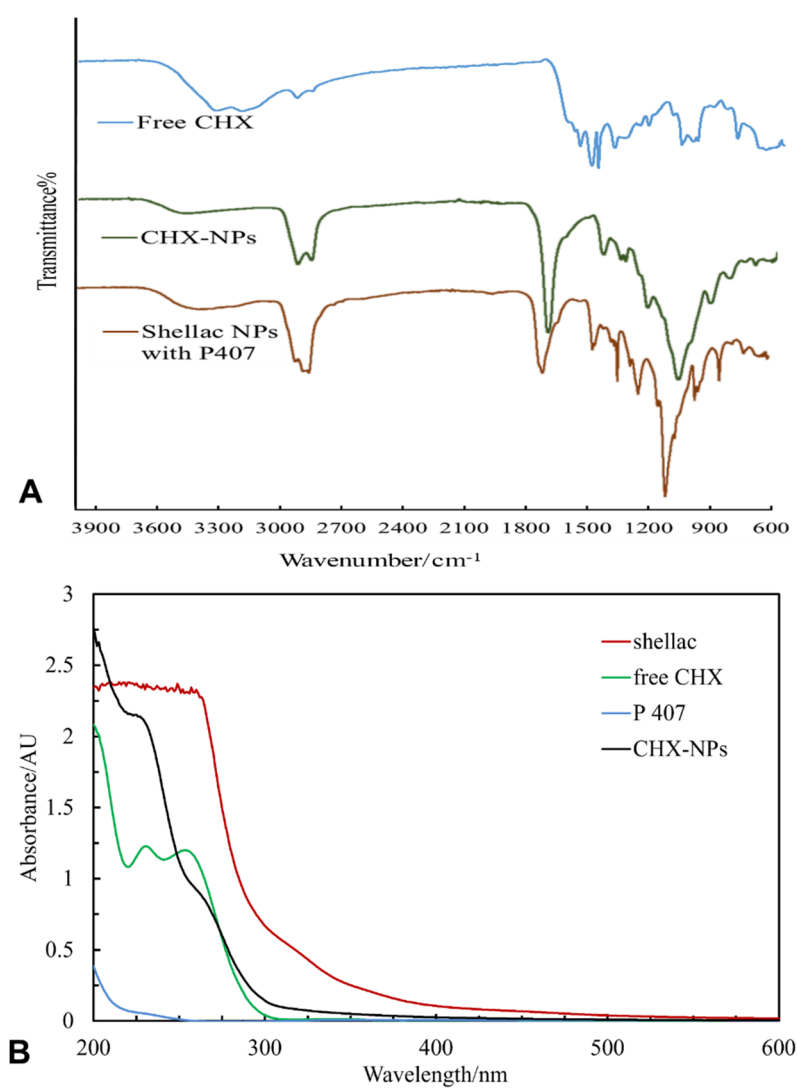

**Figure S2.** (A) The Fourier Transform-IR spectrum of chlorhexidine, 0.03 wt.%. CHX-loaded shellac NPs, and shellac NPs. (B) The absorption spectrum of chlorhexidine, free shellac, chlorhexidine loaded shellac NPs and Poloxamer 407 using UV-Vis spectrophotometry.

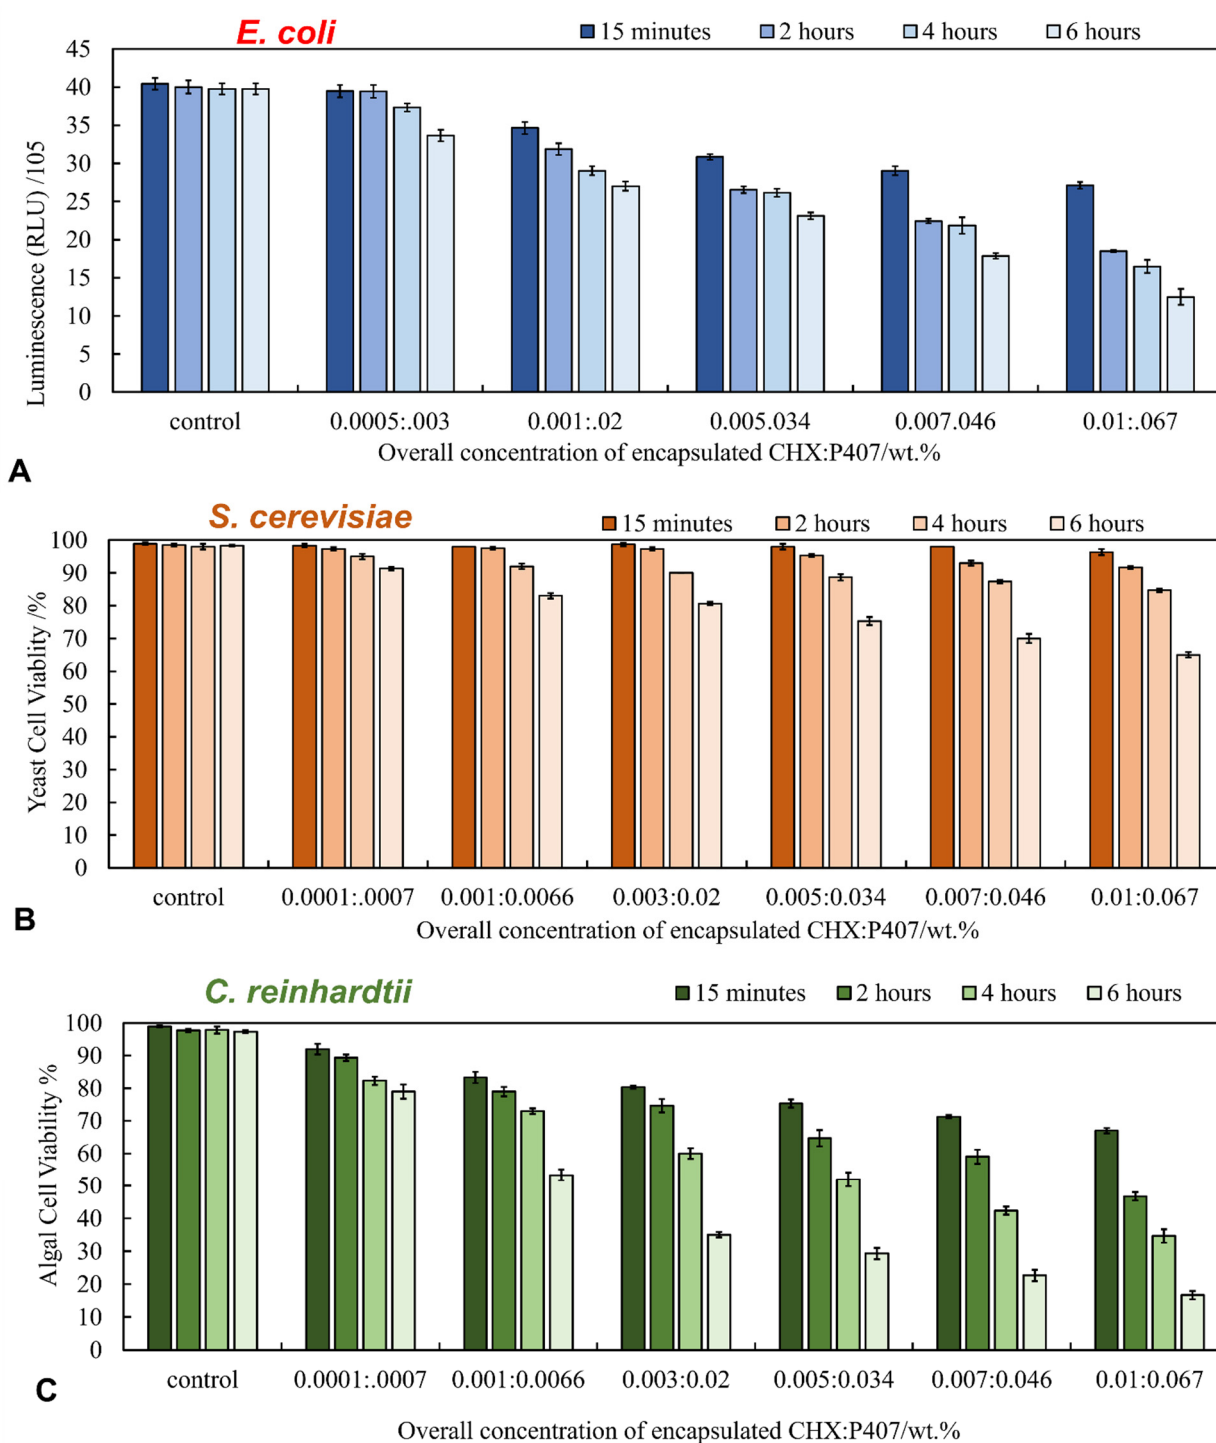

**Figure S3.** (A) The relative luminescence unit representing *E. coli* cells viability incubated at pH 5.5 with different overall concentrations of CHX-loaded shellac NPs at different incubation time 15 min, 2 h, 4 h, and 6 h at room temperature using BacTiter-Glo<sup>®</sup> Luciferase reagent. (B) The viability of yeast cells upon incubation at pH 5.5 with varied overall concentrations of CHX-loaded shellac NPs at room temperature upon 15 min, 2 h, 4 h, and 6 h of treatment time using Fluorescein Diacetate (FDA) assay. (C) The viability of algal cells upon incubation with varying concentrations of CHX-loaded shellac NPs at room temperature upon 15 min, 2 h, 4 h, and 6 h of incubation time at pH 5.5 using FDA assay, ( $n = 3$  for all data points. No ODTAB was used on the shellac NPs.

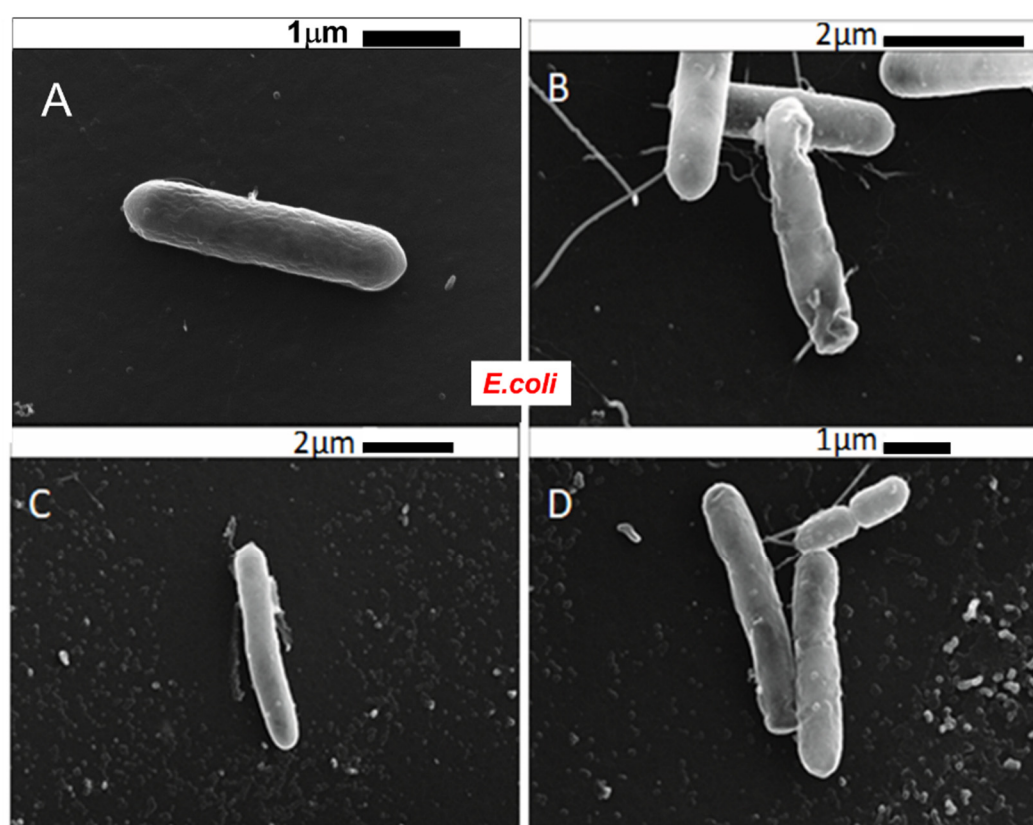

**Figure S4.** SEM images of *E.coli*. (A) Control sample of *E.coli* and (B) *E.coli* that incubated with 0.005 wt.% free CHX-DG after 4 h of treatment, (C,D) *E.coli* incubated for 4 with 0.005 wt.% of CHX-loaded shellac NPs. All experiments were conducted at 25 °C. No ODTAB was used to coat on the shellac NPs.

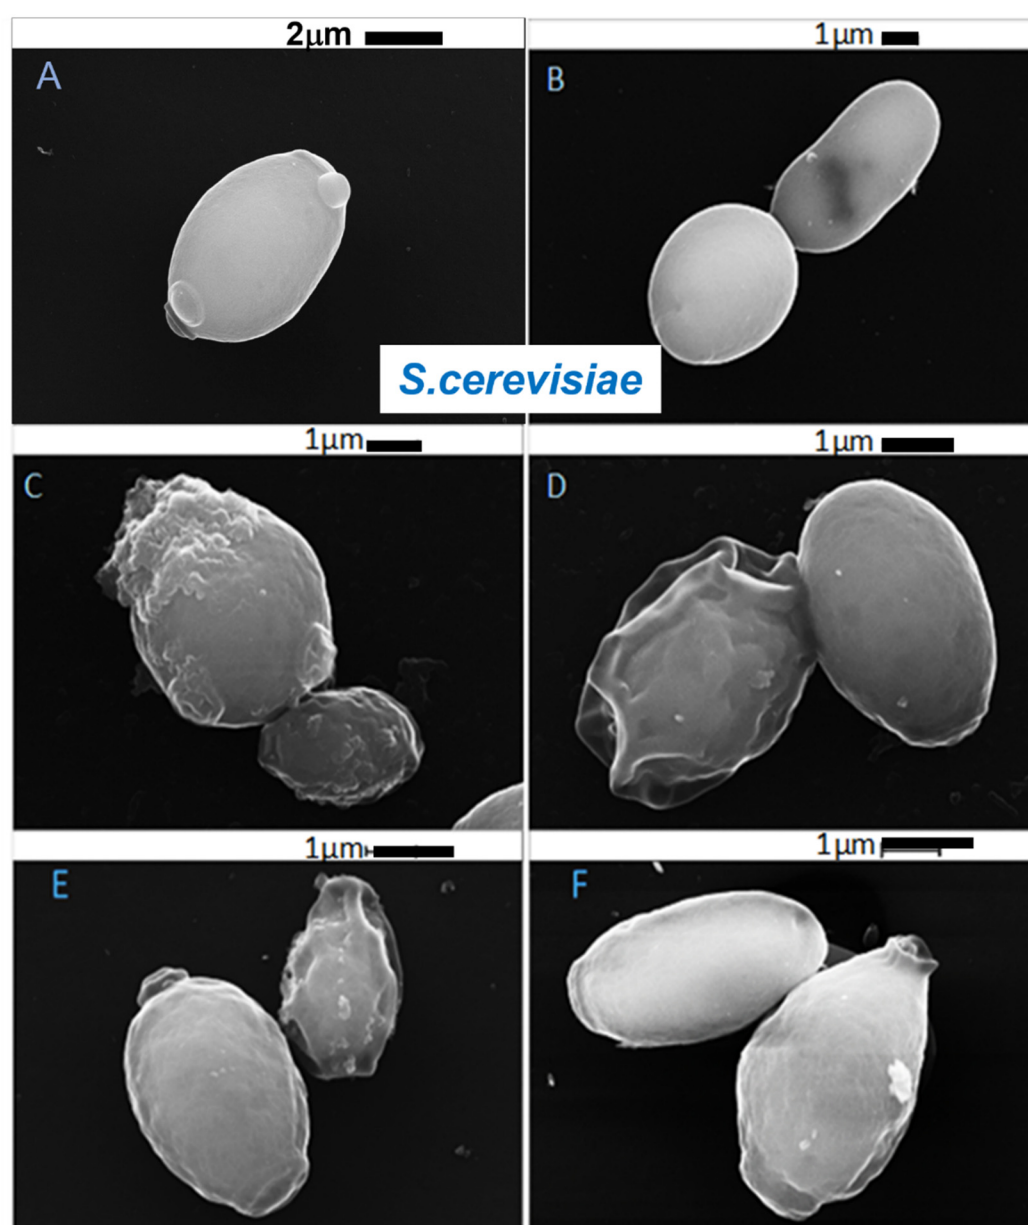

**Figure S5.** SEM images of yeast cells. (A,B) Control sample of yeast cell and (C,D) yeast cells that were incubated with 0.005 wt.% free CHX for 4 h, (E,F) yeast cell incubated for 4 h with 0.005 wt.% of CHX-loaded shellac NPs. No ODTAB was used to coat the shellac NPs.

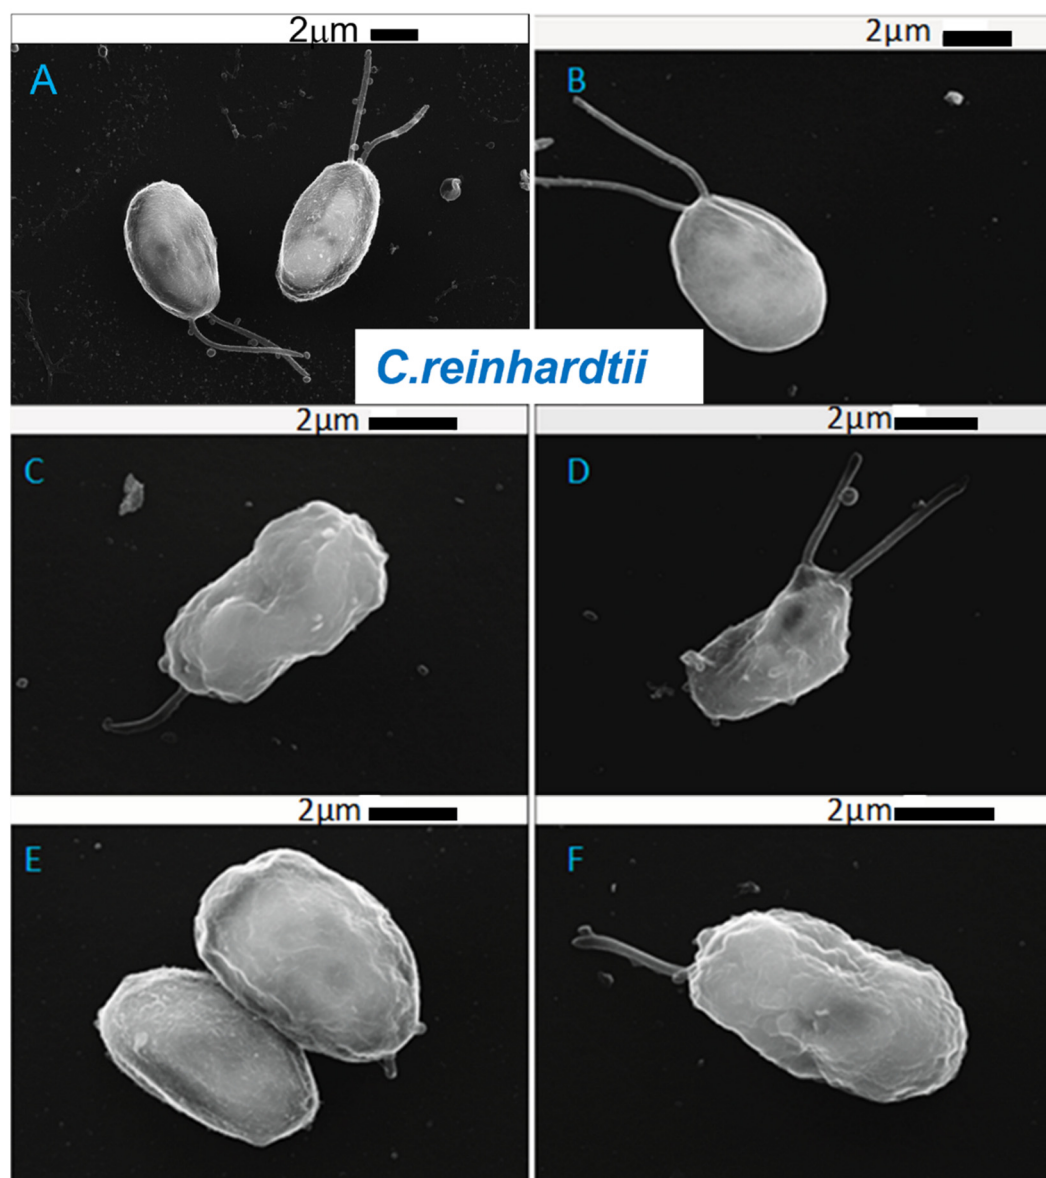

**Figure S6.** SEM images of *C. reinhardtii* cells. (A,B) A control sample of the *C. reinhardtii* microalgae cells. (C,D) *C. reinhardtii* cells incubated with a solution of 0.005 wt.% free CHX for 4 h. (E,F) *C. reinhardtii* microalgae cells incubated with 0.005 wt.% CHX-loaded shellac NPs for 4 h. No ODTAB was used on the shellac NPs in this experiment.

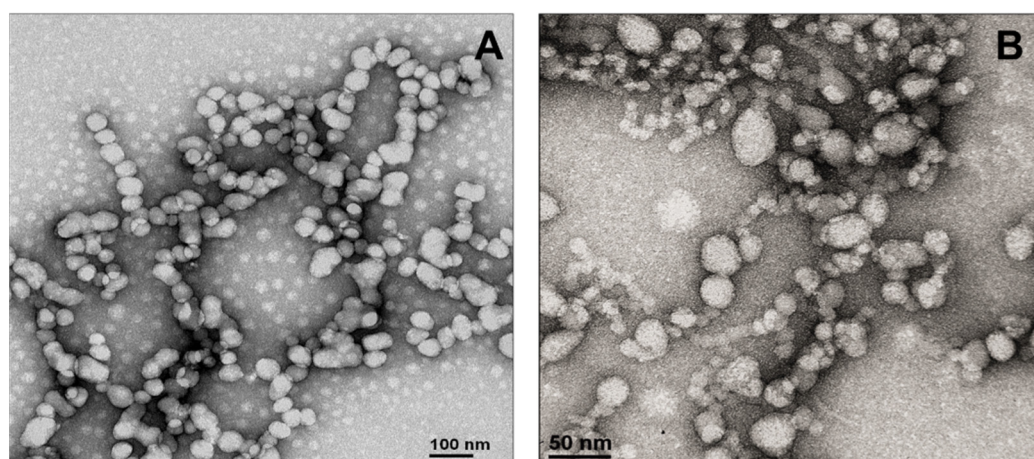

**Figure S7.** TEM images of (A) non-loaded shellac NP and (B) CHX-loaded shellac NPs. Samples were prepared and redispersed in deionized water. (A) non-loaded shellac NPs for a solution consisting of 0.25 wt. % shellac with 0.2 wt.% P407. (B) CHX-loaded shellac NPs consisting of 0.25 wt. % shellac with 0.2 wt.% P407 and 0.05 wt.% CHX dispersed in deionized water.

**Table S1.** The drug loading percent of four different concentrations of CHX-DG.

| CHX Concentration/mol mL <sup>-1</sup> | Drug Loading (%) |
|----------------------------------------|------------------|
| $1.11 \times 10^{-7}$                  | 1.7              |
| $3.3 \times 10^{-7}$                   | 9.3              |
| $4.46 \times 10^{-7}$                  | 12.8             |
| $5.57 \times 10^{-7}$                  | 16               |
